## **Expression profiles of circRNAs and identification of hsa\_circ\_0007608 and hsa\_circ\_0064656 as potential biomarkers for COPD-PH patients**

*Jinyan YU<sup>1#</sup>, Shulun HUANG<sup>1#</sup>, Weiyu SHEN<sup>1#</sup>, Zheming ZHANG<sup>1</sup>, Shugao YE<sup>2</sup>, Yuan CHEN<sup>2</sup>,*

*Yue YANG<sup>3</sup>, Tao BIAN<sup>3</sup>, Yan WU<sup>3</sup>*

*<sup>1</sup>Wuxi Clinical Medical College of Nanjing Medical University, Wuxi, Jiangsu, 214023, People's Republic of China; <sup>2</sup>Transplant Centre, Wuxi People's Hospital Affiliated to Nanjing Medical University, Wuxi, Jiangsu, 214023, People's Republic of China; <sup>3</sup>Department of Respiratory Medicine, Wuxi People's Hospital Affiliated to Nanjing Medical University, Wuxi, Jiangsu, 214023, People's Republic of China*

The authors have withdrawn their manuscript owing to their willingness to further analysis of the original data. Therefore, the authors do not wish this work to be cited as reference for the project. If you have any questions, please contact the corresponding author.
